# Supplementary material
Source: publisher site journal article supplement (https://www.dovepress.com/article/472478)
Supplement: Supplementary file 1 [file get_supplementary_file.php]

**Supplementary Table S1**

**Supplementary Figure S1**


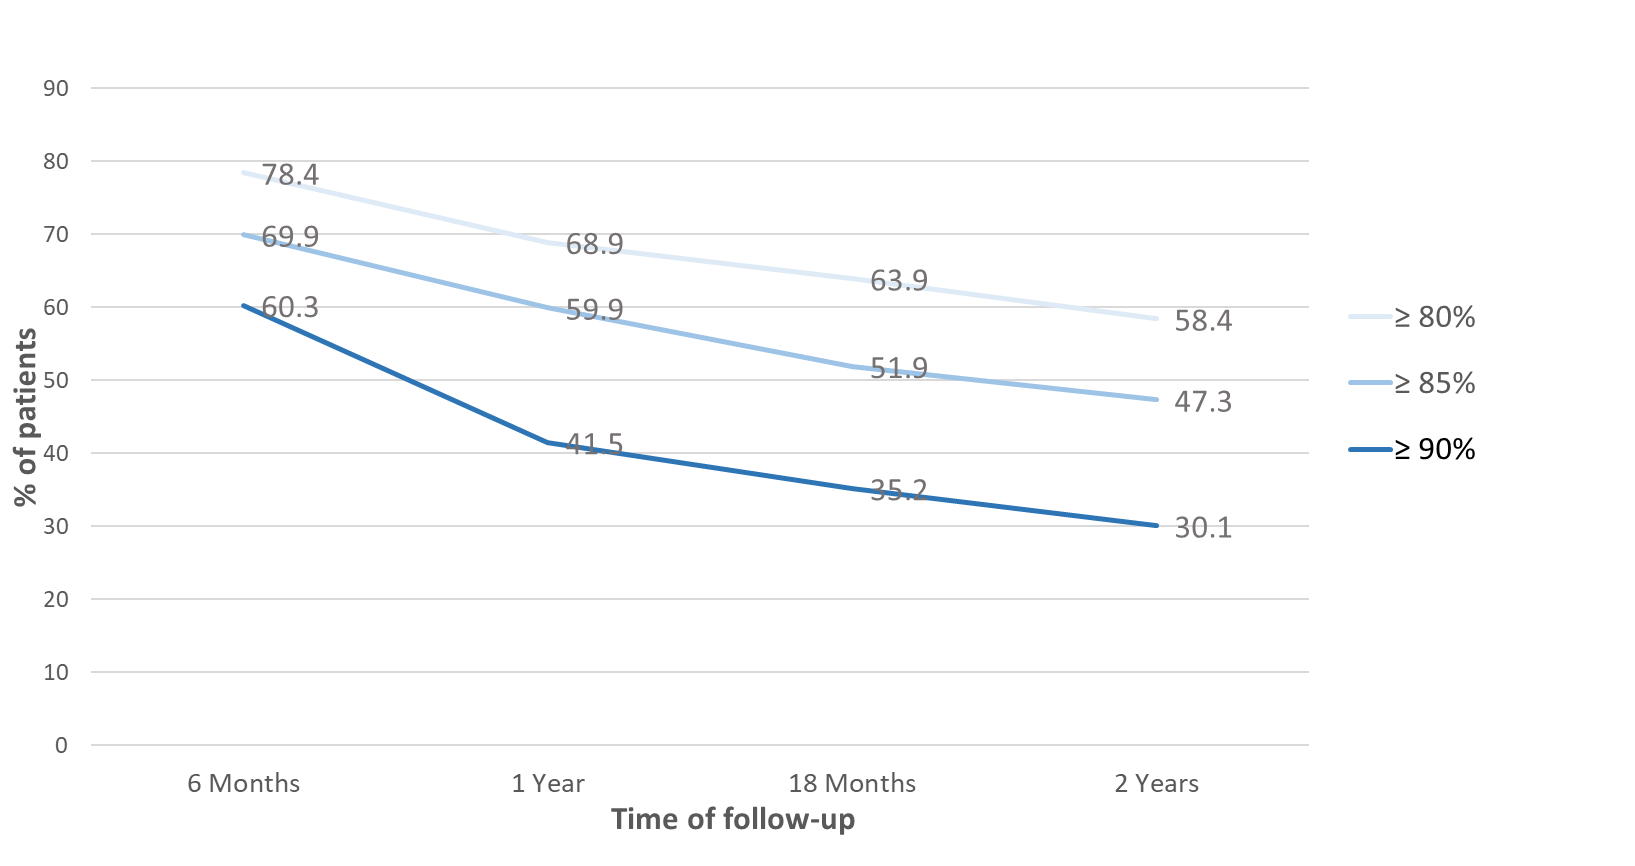


**LEGEND**: Supplementary Figure S1. Evolution over 2 years of imatinib adherence among patients with chronic myeloid leukemia depending of the threshold used to define optimal adherence, Belgium, 2004-2016

**Supplementary Figure S2**
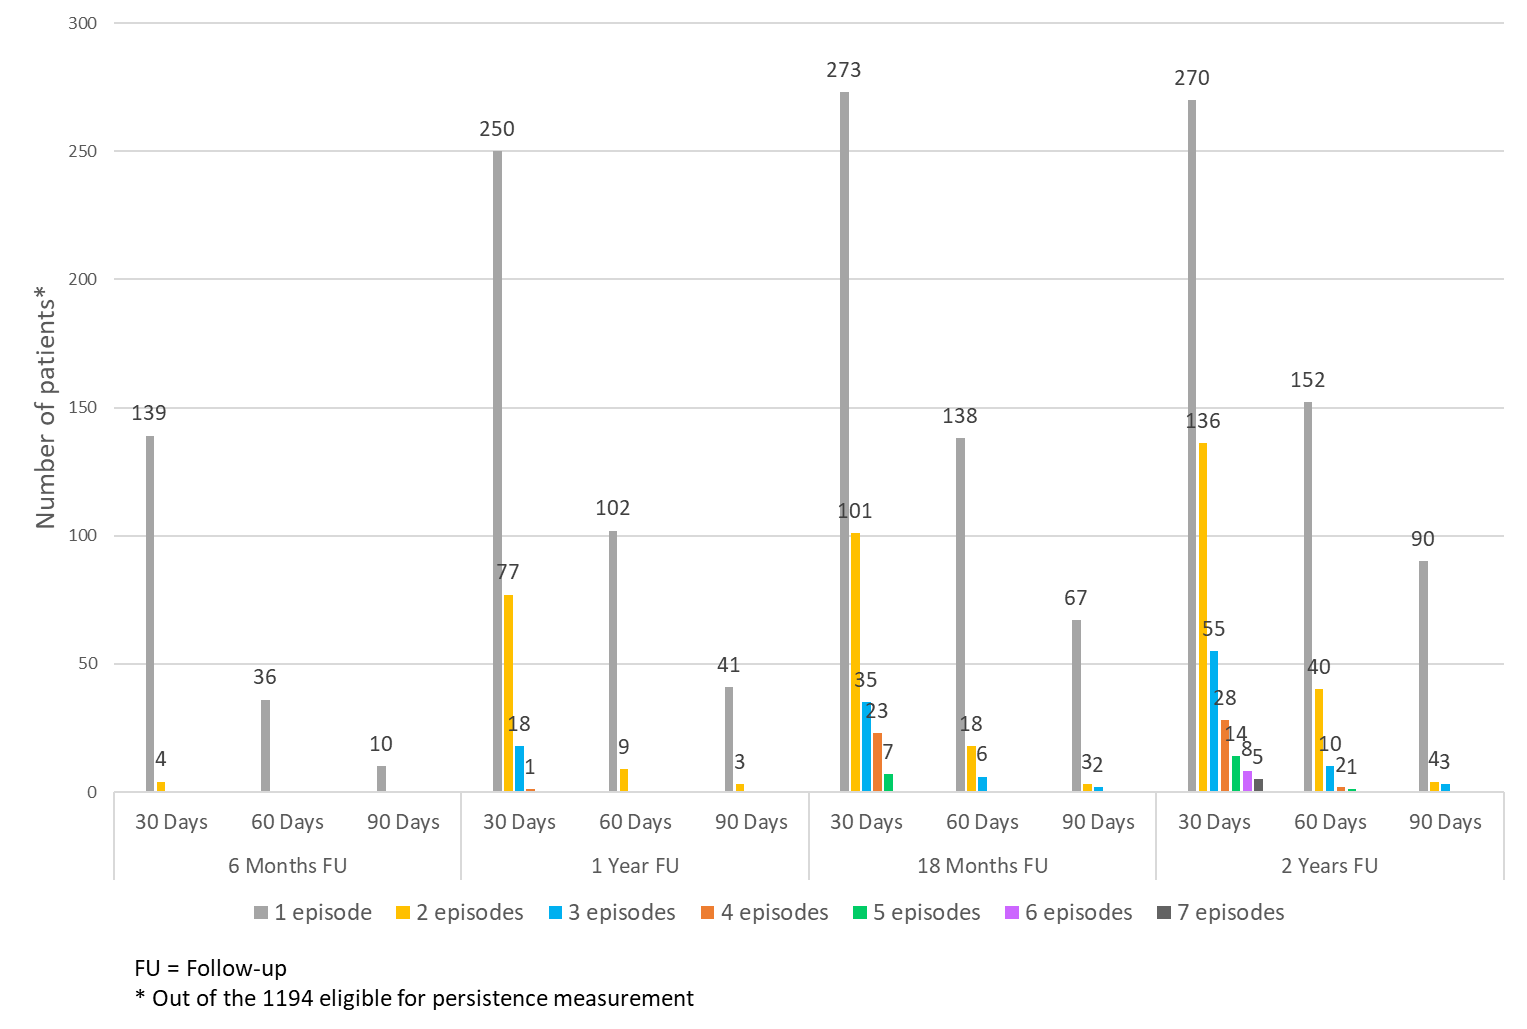


LEGEND: Supplementary Figure S2: Episodes of 30-, 60- and 90-consecutive days imatinib interruption in 1194 patients with chronic myeloid leukemia

**Supplementary Table S2**

**Supplementary Table S3**

**Supplementary Table S4**

**Supplementary Table S5**

**Supplementary Table S6**

**Supplementary Table S7**
